# Supplementary material for: Analgesia by intrathecal delta-9-tetrahydrocannabinol is dependent on Cav3.2 calcium channels
Source: Springer Nature journal article supplement (doi:10.1186/s13041-023-01036-8), 2023-05-25
Supplement: MOESM1 [file 13041_2023_1036_MOESM1_ESM.pdf]

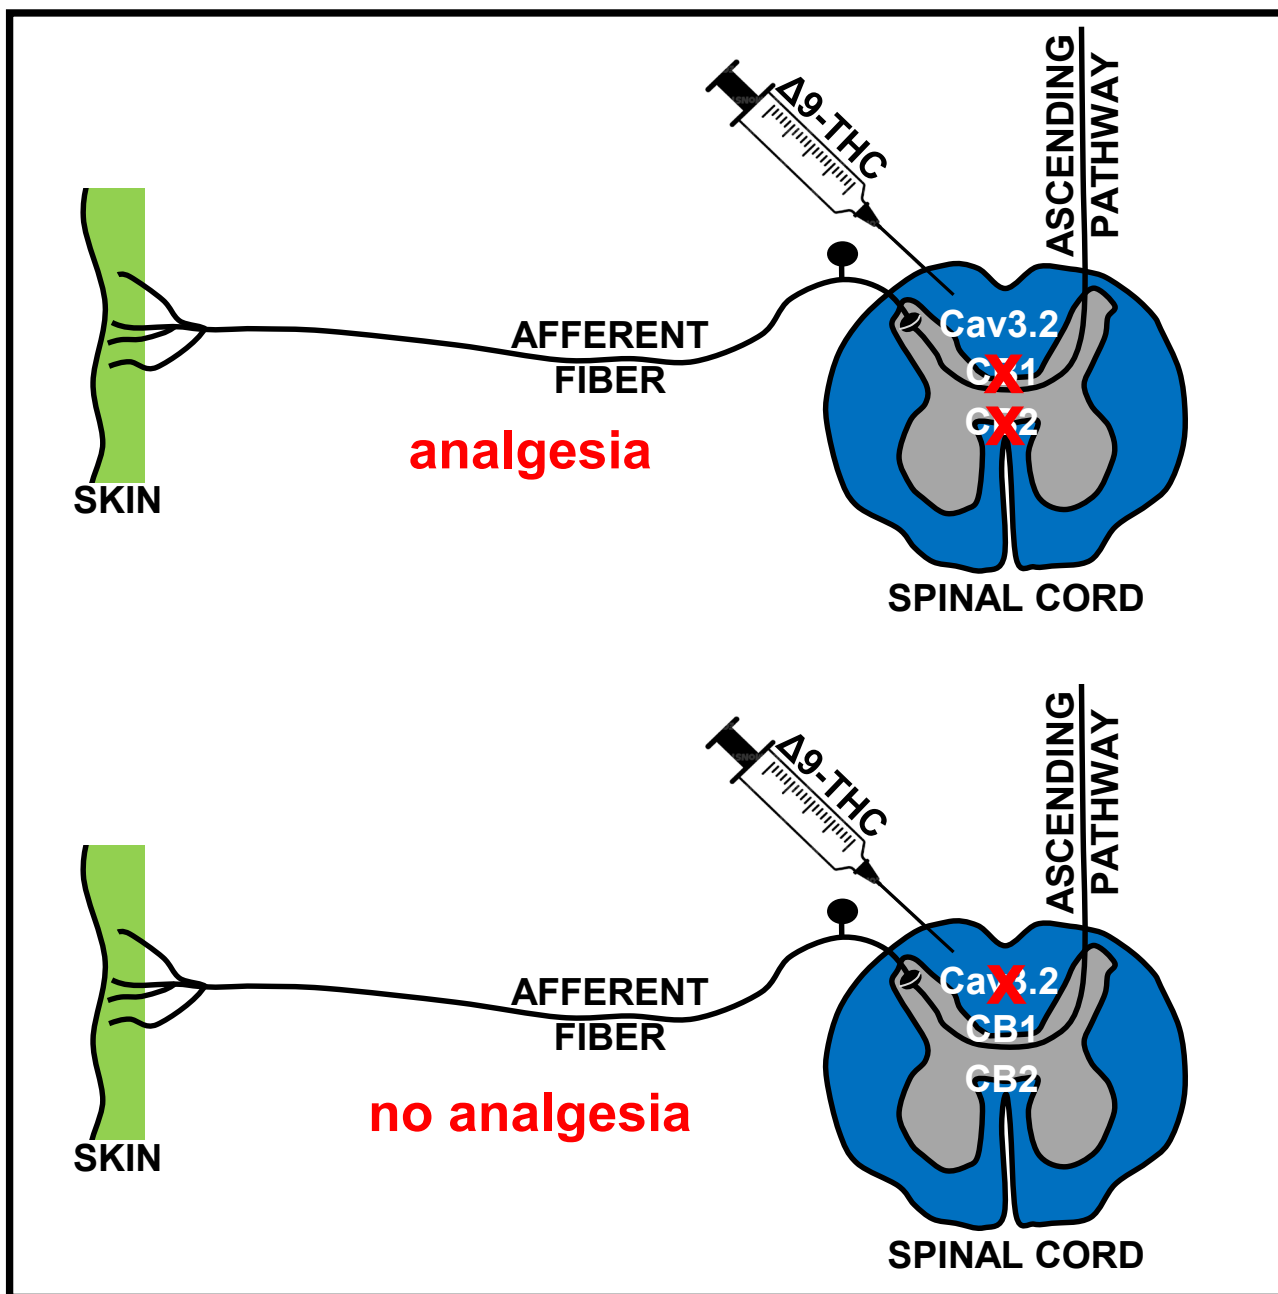

Figure S1: Graphical representation of the primary afferent pain pathway. Intrathecal injection of  $\Delta 9$ -THC induces analgesia in mice lacking either the CB1 or the CB2 receptor, but not in Cav3.2 null mice.
